# Supplementary material for: Cell type-specific transcriptomics of hypothalamic energy-sensing neuron responses to weight-loss
Source: eLife journal article supplement (doi:10.7554/elife.09800), 2015-09-02
Supplement: supp [file elife-09800-supp-v1.zip]

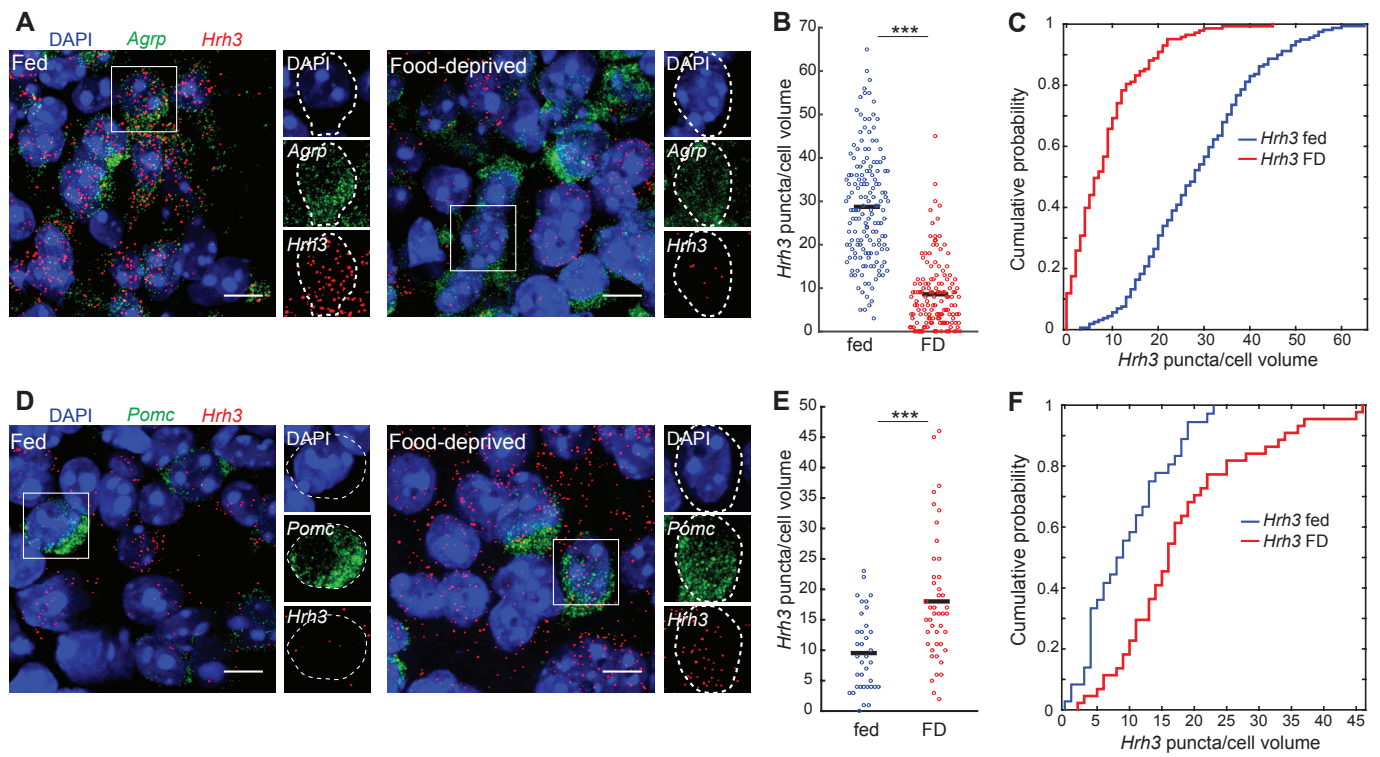

Figure 5- figure supplement 1. Opposite differential expression of *Hrh3* in AGRP and POMC neurons after food deprivation.
