# Supplementary figures and images for: Cell type-specific transcriptomics of hypothalamic energy-sensing neuron responses to weight-loss
Source: eLife journal article supplement (doi:10.7554/elife.09800), 2015-09-02

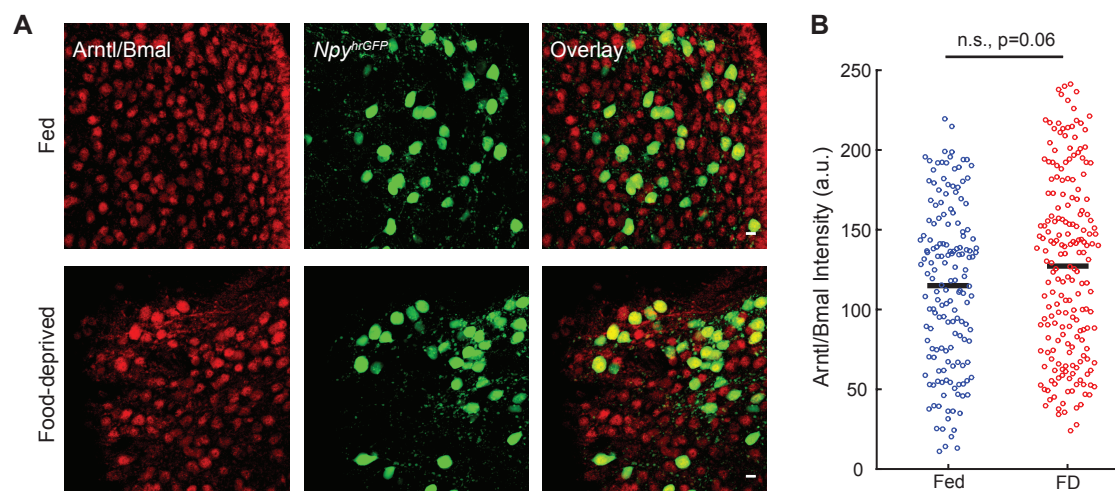

Figure 3- figure supplement 1. Arntl/Bmal expression in AGRP neurons.

Supplement: supp [file elife-09800-supp-v1.zip]

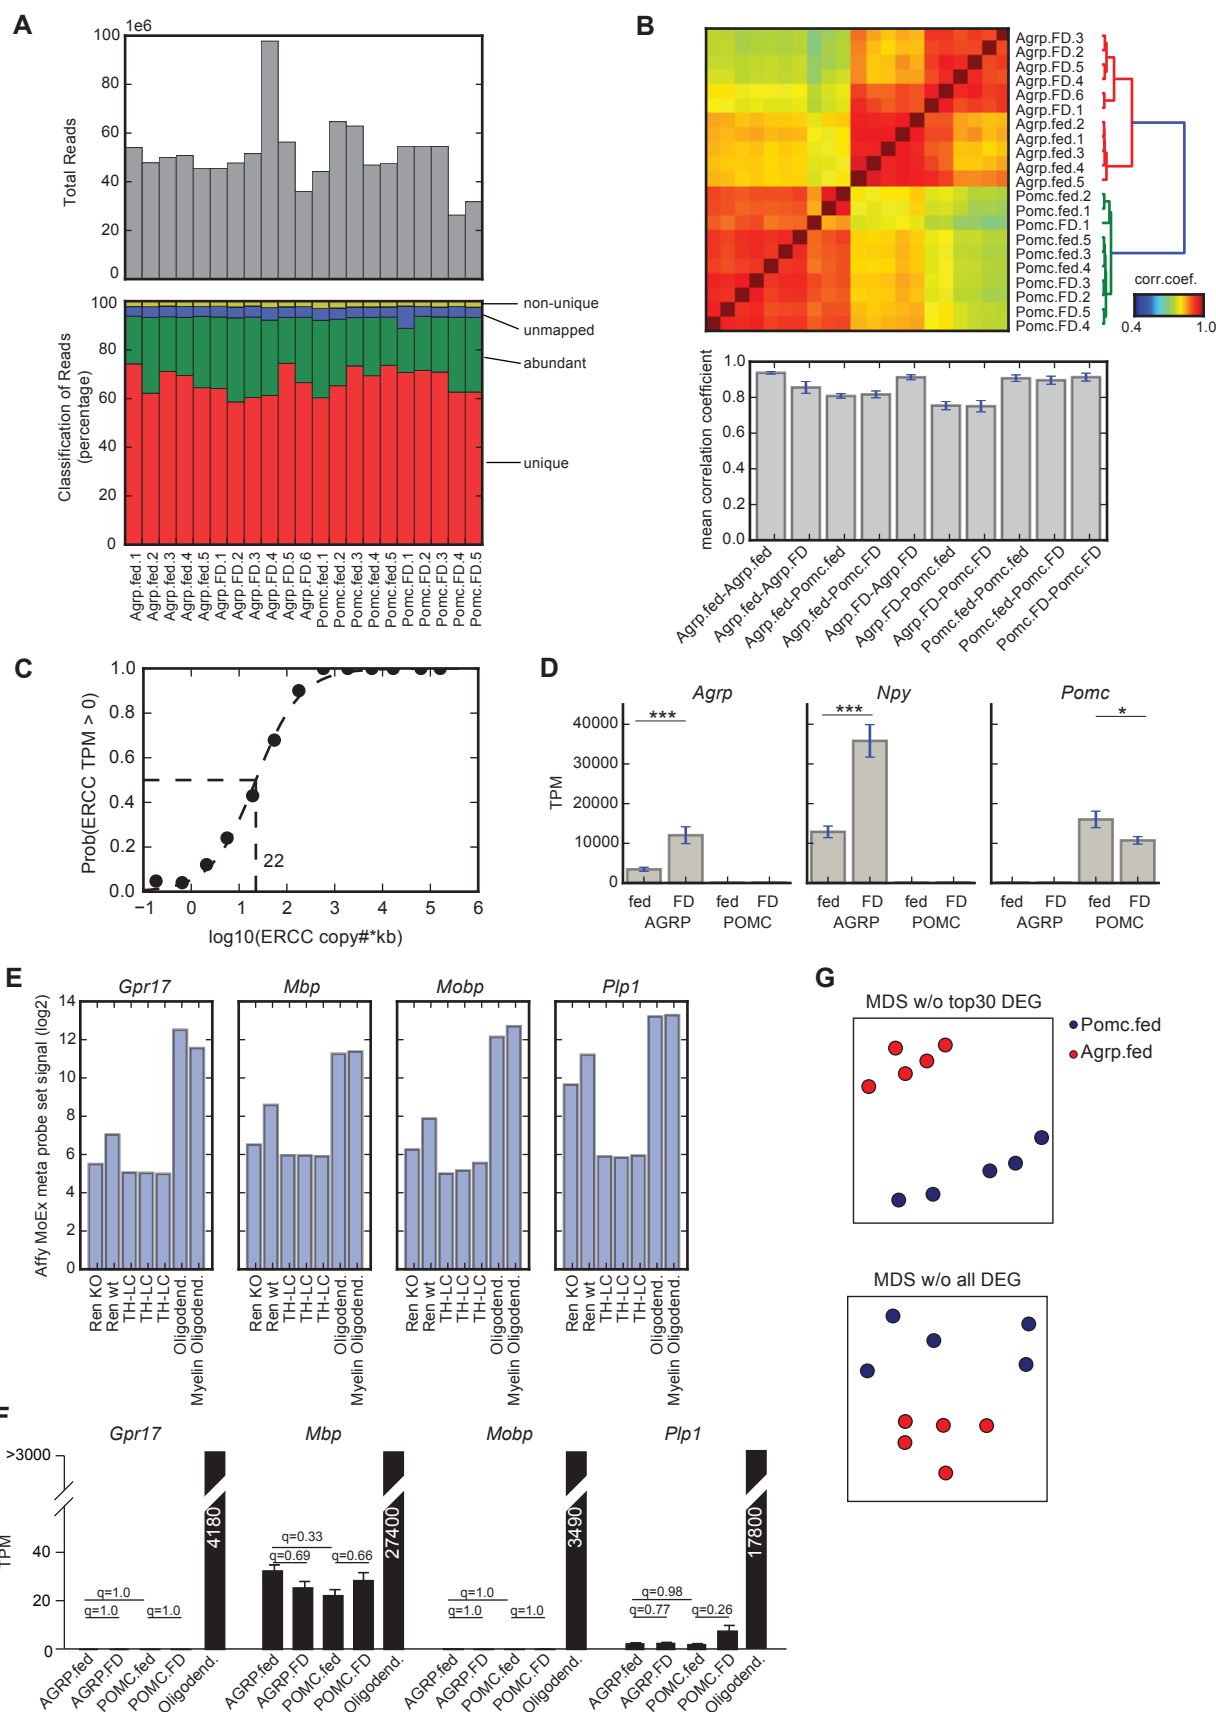

Figure 1- figure supplement 1. Comparison of AGRP and POMC neuron transcriptomic samples.

Supplement: supp [file elife-09800-supp-v1.zip]

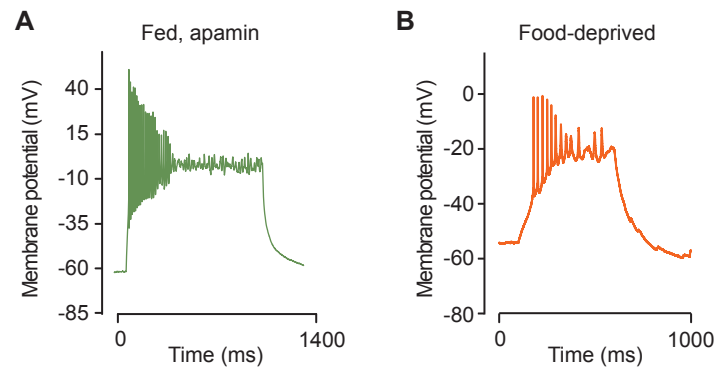

**Figure 4- figure supplement 1. Burst firing in AGRP neurons with apamin or food deprivation.**

Supplement: supp [file elife-09800-supp-v1.zip]
